# Supplementary material for: Lead-free Mn-doped antimony halide perovskite quantum dots with bright deep-red emission
Source: Royal Society of Chemistry journal article supplement (doi:10.1039/d0cc08253h), 2021-01-01
Supplement: d0cc08253h1.pdf [file d0cc08253h1.pdf]

Electronic supplementary information for

**Lead-free Mn-doped antimony halide perovskite quantum dots with bright deep-red emission**

Aifei Wang,<sup>†a,b</sup> Faheem Muhammad,<sup>†a</sup> Yao Liu,<sup>a</sup> and Zhengtao Deng<sup>\*a</sup>

- a. *College of Engineering and Applied Sciences, State Key Laboratory of Analytical Chemistry for Life Science, National Laboratory of Microstructures, Nanjing University, Nanjing, Jiangsu, 210023, P. R. China*
- b. *Current address: Institute of Advanced Materials (IAM), Nanjing Tech University (NJ Tech), 5 Xinmofan Road, Nanjing 210009, P.R. China*

## EXPERIMENTAL SECTION

**Chemicals.** All reagents and solvents were used without further purification. Antimony trichloride ( $\text{SbCl}_3$ , 99.95 %), antimony tribromide ( $\text{SbBr}_3$ , 99.5 %, Alfa), Magnesium chloride hexahydrate ( $\text{MgCl}_2 \cdot 6\text{H}_2\text{O}$ , AR, Aladdin), Magnesium bromide hexahydrate ( $\text{MgBr}_2 \cdot 6\text{H}_2\text{O}$ , 98 %, Aladdin), Manganese chloride ( $\text{MnCl}_2 \cdot 4\text{H}_2\text{O}$ , 99.0 %, Aladdin), Manganese(II) bromide ( $\text{MnBr}_2$ , 99%, Aladdin), Caesium chloride ( $\text{CsCl}$ ,  $\geq 99$  %, Aladdin), Caesium bromide ( $\text{CsBr}$ , 99.5 %, Aladdin), Oleylamine (OLAm, 80-90%, Aladdin), oleic acid (OA, 85%, Aladdin), Dimethylsulfoxide (DMSO, AR, Xiya), Isopropanol (IPA, AR  $\geq 99.5$  %, Macklin), n-Octanoic acid (98 %, Aladdin), poly(ethylene glycol) methyl ether thiol (PEG-SH, Mn=5000, Aldrich), 1-Dodecanethiol (98 %, Aladdin), 1-Octanethiol (98 %, Aladdin), n-Butanol (99 %, Aladdin), 3-Mercaptopropionic acid (MPA, 98%, Aladdin).

**Synthesis of  $\text{Mn}^{2+}$ -doped  $\text{Cs}_3\text{Sb}_2\text{Cl}_x/\text{Br}_{9-x}$  ( $0 \leq x \leq 9$ ) perovskite quantum dots.** Colloidal  $\text{Mn}^{2+}$ -doped  $\text{Cs}_3\text{Sb}_2\text{X}_9$  NCs were synthesized following the ligand-assisted reprecipitation (LARP) technique. Typically, precursor solution was prepared by dissolving a mixture of CsX (0.6 mmol),  $\text{SbX}_3$  (0.4 mmol), OLAm (0.3 mmol) into DMSO (4 mL). Then, precursor solution 200  $\mu\text{L}$  was dropped into a clear solution of mixed solution of 2 mL IPA,  $\text{MnX}_2$  (0.01-0.1 mmol) and 30 mg poly(ethylene glycol)methyl ether thiol (mPEG-SH,) under vigorous stirring. Claret fluorescence emission was observed during stirring. Different  $\text{Cl}^-$  and  $\text{Br}^-$  ratios in  $\text{Mn}^{2+}$ -doped  $\text{Cs}_3\text{Sb}_2\text{Cl}_x/\text{Br}_{9-x}$  ( $0 \leq x \leq 9$ ) perovskite QDs were tuned by adding additional  $\text{MgX}_2$ . Ligands effects on  $\text{Mn}^{2+}$ -doped  $\text{Cs}_3\text{Sb}_2\text{X}_9$  NCs were studied by simply substituting the equimolar amounts of organic carboxylic acid or mercaptan (OA, n-Octanoic acid, 1-Dodecanethiol, 1-Octanethiol, n-Butanol, MPA).

**Characterization Details.** Powder X-ray diffraction (PXRD) was measured with a Bruker AXS D8 X-ray diffractometer equipped with monochromatized Cu  $K\alpha$  radiation ( $\lambda=1.5418 \text{ \AA}$ ). Transmission electron microscopy (TEM) was performed on an FEI Tecnai G2 F20 electron microscope operating at 200 kV. Photoluminescence (PL) spectra were obtained with a Horiba PTI QuantaMaster 400 steady-state fluorescence system. The absolute fluorescence quantum yields were measured using a Horiba PTI QuantaMaster 400 steady-state fluorescence system with an integrated sphere and a Quantaaurus-QY absolute PL quantum yield spectrometer (C11347 series).

**Cell labelling with QDs and Confocal microscopy.** Cell lines were cultured in RPMI 1640 medium supplemented with 10% heat-inactivated fetal bovine serum (GIBCO) and 100 units ml<sup>-1</sup> penicillin–streptomycin (Cellgro) in a humidified incubator at 37 °C containing 5%  $\text{CO}_2$ . Cell binding buffer was prepared by dissolving 0.9 g glucose (Sigma), 0.2033 g magnesium chloride hexahydrate (Sigma), 20

mg yeast tRNA (Sigma) and 200 mg BSA in 200 ml 1 Dulbecco's PBS (with  $MgCl_2$  and  $CaCl_2$ ) supplemented with 10% FBS (heat inactivated).  $1 \times 10^5$  Ramos cells were suspended in 300  $\mu$ l buffer containing 200 nM of  $Mn^{2+}$ -doped  $Cs_3Sb_2Cl_x/Br_{9-x}$  ( $0 \leq x \leq 9$ ) perovskite QDs and incubated at 4 °C for a few minutes. The cells were then recollected by centrifugation and washed. The images were obtained with a Zeiss LSM 510 confocal microscope.

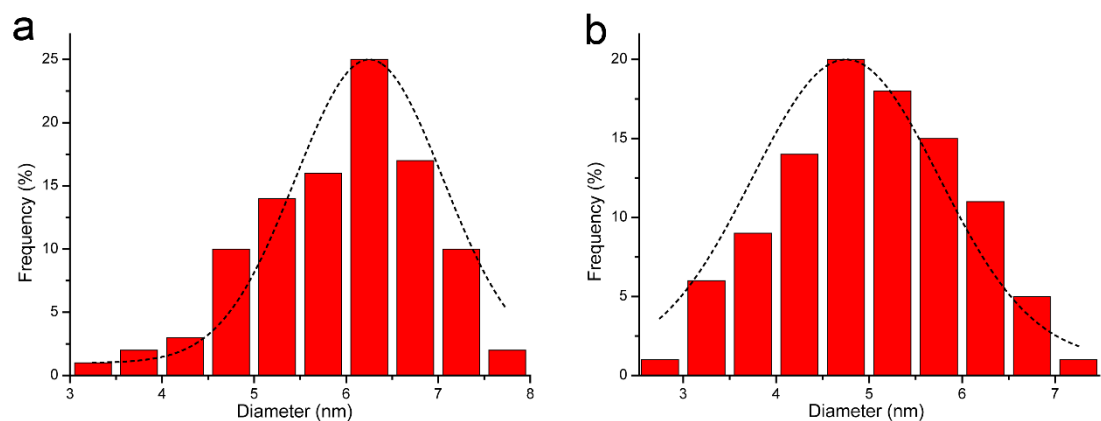

**Figure S1.** Size distribution histogram of (a) undoped  $Cs_3Sb_2Cl_9$  and (b) Mn-doped  $Cs_3Sb_2Cl_x/Br_{9-x}$  ( $0 \leq x \leq 9$ ) QDs.

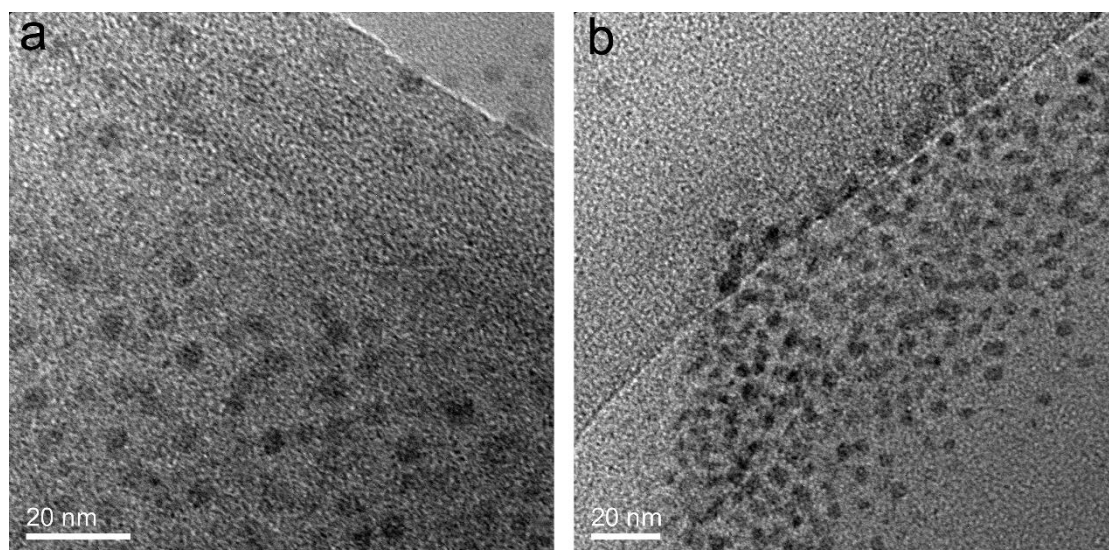

**Figure S2.** TEM images of other  $Mn^{2+}$ -doped  $Cs_3Sb_2Cl_x/Br_{9-x}$  ( $0 \leq x \leq 9$ ) QDs with feeding ratio of (a) Sb: Mn=1:1 and (b) Sb: Mn=1:3.

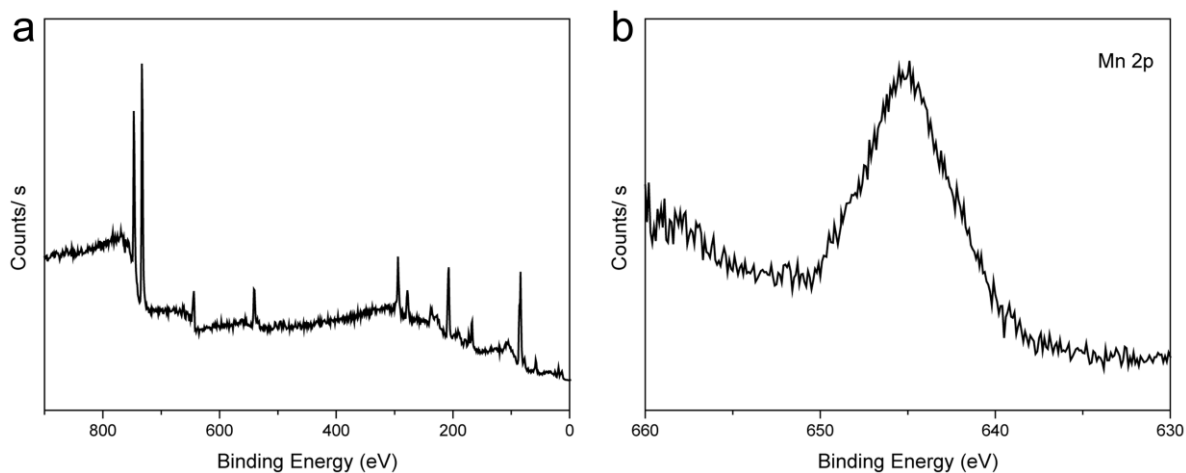

**Figure S3.** XPS spectra of Mn-doped  $\text{Cs}_3\text{Sb}_2\text{Cl}_9$  and  $\text{Cs}_3\text{Sb}_2\text{Cl}_x/\text{Br}_{9-x}$  (actual feeding ratio of Cl:Br =2:1 and Mn:Sb =2:1) QDs.

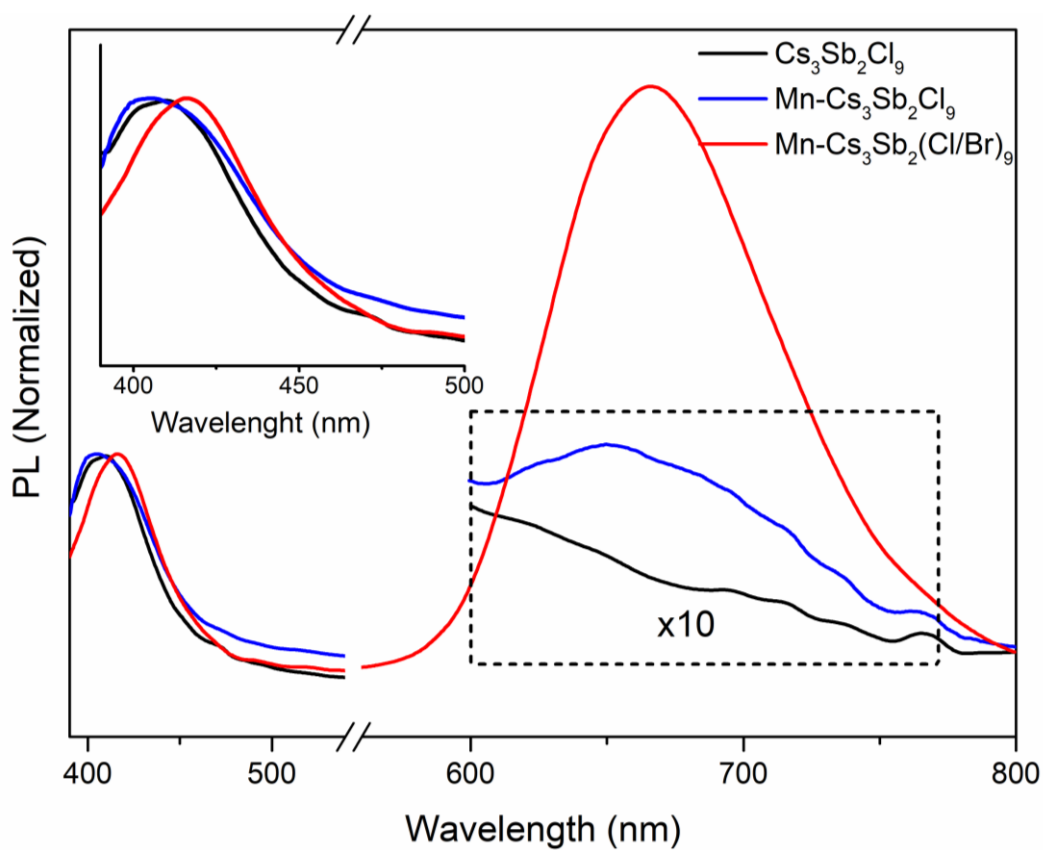

**Figure S4.** PL emission spectra of the undoped  $\text{Cs}_3\text{Sb}_2\text{Cl}_9$ , Mn-doped  $\text{Cs}_3\text{Sb}_2\text{Cl}_9$  and  $\text{Cs}_3\text{Sb}_2\text{Cl}_x/\text{Br}_{9-x}$  (actual feeding ratio of Cl:Br =2:1 and Mn:Sb =2:1) QDs.

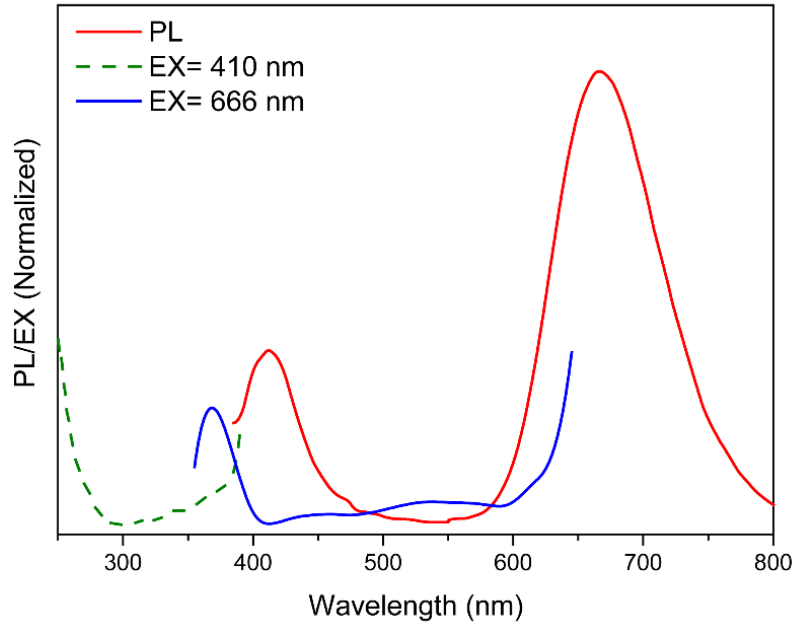

**Figure S5.** PL excitation (EX) and PL emission spectra of  $\text{Mn}^{2+}$ -doped  $\text{Cs}_3\text{Sb}_2\text{Cl}_x/\text{Br}_{9-x}$  ( $0 \leq x \leq 9$ ) QDs.

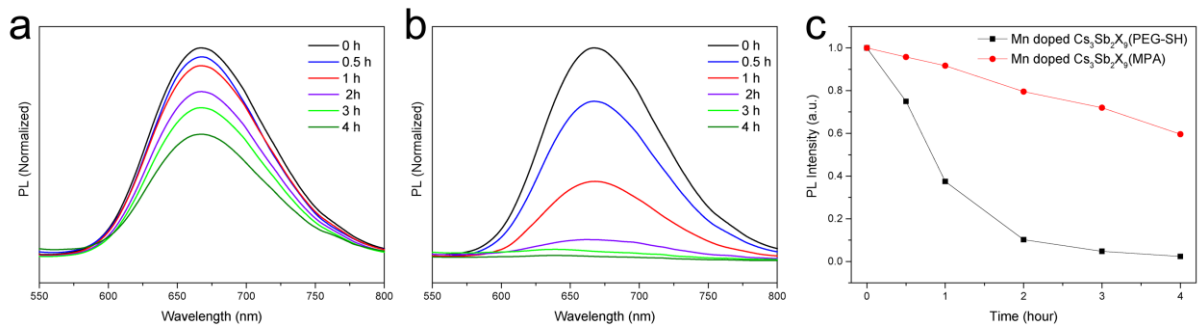

**Figure S6.** PL intensity changes of the Mn-doped QDs in the presence of water within 4 hours. (a) MPA and (b) PEG-SH synthesized Mn-doped  $\text{Cs}_3\text{Sb}_2(\text{Br}_{0.25}/\text{Cl}_{0.75})_9$  QDs. (c) summary of the PL intensity changes of (a) and (b).

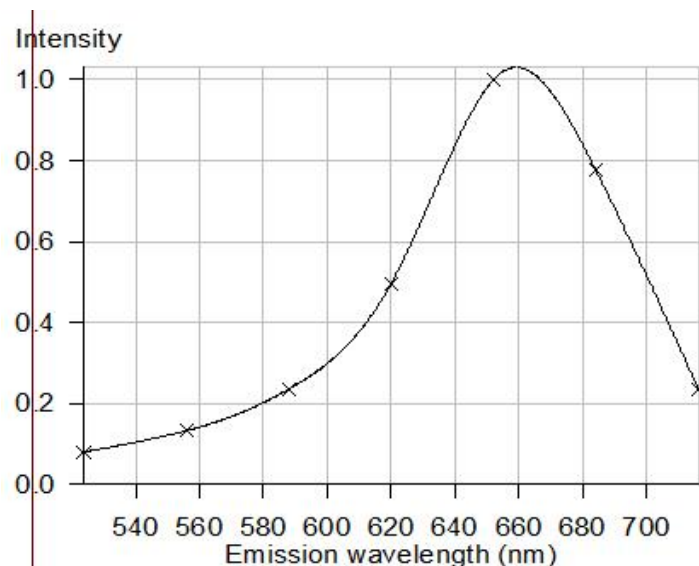

**Figure S7.** PL emission spectrum of  $\text{Mn}^{2+}$ -doped  $\text{Cs}_3\text{Sb}_2\text{Cl}_x/\text{Br}_{9-x}$  ( $0 \leq x \leq 9$ ) QDs labeled on Ramos cells taking with the confocal microscope. The excitation wavelength is 405 nm.

**Table S1.** Summary of comparison PL characteristics of undoped and  $\text{Mn}^{2+}$ -doped lead-free halide perovskite materials in bulk and QDs form. High temperature (HT) and room temperature (RT).

| Composition                                   | Sample Size      | Synthesize Method                    | PL center    | PL QYs (Measure Method)            | Ref. |
|-----------------------------------------------|------------------|--------------------------------------|--------------|------------------------------------|------|
| $\text{Cs}_3\text{Sb}_2\text{Cl}_9$ nanowires | 20 nm (diameter) | hot-injection (HT)                   | 436 nm       | 4% (integrated sphere)             | 1    |
| $\text{Cs}_3\text{Sb}_2\text{Br}_9$ QDs       | 3.07 nm          | ligand-assisted reprecipitation (RT) | 410 nm       | 46% (standard sample)              | 2    |
| $\text{Cs}_3\text{Bi}_2\text{I}_9$ NCs        | 19 nm            | hot-injection (HT)                   | 580 - 605 nm | 0.017% (not mention)               | 3    |
| $\text{MA}_3\text{Bi}_2\text{Br}_9$ QDs       | 3.05 nm          | ligand-assisted reprecipitation (RT) | 360 - 540 nm | 12% (standard sample)              | 4    |
| $\text{MA}_3\text{Bi}_2\text{Br}_9$ QDs       | 6.02 nm          | ligand-assisted reprecipitation (RT) | 422 nm       | 54.1% (standard sample)            | 5    |
| $\text{Cs}_3\text{Bi}_2\text{Br}_9$ QDs       | 6 nm             | ligand-assisted reprecipitation (RT) | 460 nm       | 0.2%-4.5% (standard sample)        | 6    |
| $\text{Cs}_2\text{AgBiX}_6$ QDs               | 8 nm             | hot-injection (HT)                   | 629-738 nm   | $\sim 0.3 \pm 0.3\%$ (not mention) | 7    |
| Mn-doped $\text{Cs}_2\text{AgInCl}_6$         | bulk crystals    | concentrated acid precipitation      | 632 nm       | doped=3-5% (standard sample)       | 8    |

(RT)

|                                                                                |                                   |                                      |                                  |                                                   |           |
|--------------------------------------------------------------------------------|-----------------------------------|--------------------------------------|----------------------------------|---------------------------------------------------|-----------|
| Mn-doped Cs <sub>2</sub> AgInCl <sub>6</sub> QDs                               | 9.8 nm (undoped)<br>12 nm (doped) | hot-injection (HT)                   | bandage=560nm<br>doped=620nm     | undoped =1.6%<br>doped=16%<br>(integrated sphere) | 9         |
| Mn-doped Cs <sub>2</sub> NaBiCl <sub>6</sub>                                   | bulk crystals                     | concentrated acid precipitation (RT) | 590 nm                           | doped=15%<br>(integrated sphere)                  | 10        |
| Mn-doped Cs <sub>2</sub> NaBiCl <sub>6</sub>                                   | 11 nm                             | hot-injection (HT)                   | 600 nm                           | 5.0%.                                             | 11        |
| Mn-Doped Cs <sub>2</sub> NaIn <sub>x</sub> Bi <sub>1-x</sub> Cl <sub>6</sub>   | 10.45 ± 0.5 nm                    | hot-injection (HT)                   | around 600 nm                    | 44.6%                                             | 12        |
| Cs <sub>3</sub> Sb <sub>2</sub> Cl <sub>x</sub> /Br <sub>9-x</sub> (0≤x≤9) QDs | 6 nm                              | ligand-assisted reprecipitation (RT) | bandage=410-465nm<br>doped=660nm | undoped=0.8%<br>doped=49%<br>(integrated sphere)  | This work |

**Table S2.** Summary of Mn<sup>2+</sup> emission lifetime analysis of various feeding molar ratio of Mn/Sb.

| Mn:Sb | τ1    | τ2    | A1       | A2      | τ ns     |
|-------|-------|-------|----------|---------|----------|
| 0.5:1 | 0.78  | 91.06 | 11081.71 | 5356.84 | 496437.6 |
| 1:1   | 34.85 | 63.66 | 1201.85  | 2246.88 | 184920.9 |
| 2:1   | 0.78  | 23.82 | 16521.21 | 3013.03 | 143639.4 |
| 3:1   | 1.46  | 30.04 | 4299.52  | 1817.51 | 60875.3  |

**Table S3.** Summary of Mn<sup>2+</sup> emission lifetime analysis of various feeding molar ratio of Cl/Br.

| Cl Content | τ1   | τ2    | A1       | A2      | τ ns     |
|------------|------|-------|----------|---------|----------|
| 100 %      | 1.07 | 12.43 | 18442.72 | 826.03  | 30001.26 |
| 60 %       | 9.93 | 54.9  | 578.96   | 208.08  | 17172.66 |
| 50 %       | 1.12 | 47.63 | 15820.47 | 1527.75 | 90485.66 |
| 33 %       | 1.05 | 54.67 | 15767.39 | 2276.97 | 141037.7 |

**Table S4.** Bond dissociation energy (kJ/mol) of metals cations and halides/ligands anions.

|                 | Cs <sup>+</sup> | Sb <sup>3+</sup> | Mn <sup>2+</sup> |
|-----------------|-----------------|------------------|------------------|
| Cl <sup>-</sup> | 117.4           | 410              | 337.6            |
| Br <sup>-</sup> | 610.5           | 373              | 323.8            |
| S <sup>2-</sup> | -               | 378.7            | 318              |

## References for supplementary information:

1. B. Pradhan, G. S. Kumar, S. Sain, A. Dalui, U. K. Ghorai, S. K. Pradhan and S. Acharya, *Chem. Mater.*, 2018, **30**, 2135-2142.
2. J. Zhang, Y. Yang, H. Deng, U. Farooq, X. Yang, J. Khan, J. Tang and H. Song, *ACS nano*, 2017, **11**, 9294-9302.
3. Y. Zhang, J. Yin, M. R. Parida, G. H. Ahmed, J. Pan, O. M. Bakr, J. L. Bredas and O. F. Mohammed, *J. Phys. Chem. Lett.*, 2017, **8**, 3173–3177.
4. M. Leng, Z. Chen, Y. Yang, Z. Li, K. Zeng, K. Li, G. Niu, Y. He, Q. Zhou and J. Tang, *Angew. Chem. Int. Ed.*, 2016, **55**, 15012-15016.
5. M. Leng, Y. Yang, Z. Chen, W. Gao, J. Zhang, G. Niu, D. Li, H. Song, J. Zhang, S. Jin and J. Tang, *Nano Lett.*, 2018, **18**, 6076–6083.
6. B. Yang, J. Chen, F. Hong, X. Mao, K. Zheng, S. Yang, Y. Li, T. Pullerits, W. Deng and K. Han, *Angew. Chem.*, 2017, **129**, 12645-12649.
7. S. E. Creutz, E. N. Crites, M. C. De Siena and D. R. Gamelin, *Nano Lett.*, 2018, **18**, 1118-1123.
8. N. N. K and A. Nag, *Chem. Commun.*, 2018, **54**, 5205-5208.
9. F. Locardi, M. Cirignano, D. Baranov, Z. Dang, M. Prato, F. Drago, M. Ferretti, V. Pinchetti, M. Fanciulli, S. Brovelli, L. De Trizio and L. Manna, *J. Am. Chem. Soc.*, 2018, **140**, 12989-12995.
10. J. D. Majher, M. B. Gray, T. A. Strom and P. M. Woodward, *Chem. Mater.*, 2019, **31**, 1738-1744.
11. W. Lee, D. Choi and S. Kim, *Chem. Mater.*, 2020, **32**, 6864–6874.
12. P. Han, X. Zhang, C. Luo, W. Zhou, S. Yang, J. Zhao, W. Deng and K. Han, *ACS Central Sci.*, 2020, **6**, 566-572.
